# Supplementary material for: Highly selective demethylation of anisole to phenol over H4Nb2O7 modified MoS2 catalyst
Source: Royal Society of Chemistry journal article supplement (doi:10.1039/d0cy01972k), 2021-01-01
Supplement: d0cy01972k1.pdf [file d0cy01972k1.pdf]

## Electronic Supplementary Information

# Highly selective demethylation of anisole to phenol over H<sub>4</sub>Nb<sub>2</sub>O<sub>7</sub> modified MoS<sub>2</sub> catalyst

Na Ji,<sup>\*a</sup> Zhenjiao Wang,<sup>a</sup> Xinyong Diao,<sup>a</sup> Zhichao Jia,<sup>a</sup> Tingting Li,<sup>a</sup> Yujun Zhao,<sup>b</sup> Qingling Liu,<sup>a</sup>  
Xuebin Lu,<sup>a,c</sup> Degang Ma,<sup>a</sup> and Chunfeng Song<sup>a</sup>

<sup>a</sup>School of Environmental Science and Engineering, Tianjin Key Laboratory of Biomass/Wastes Utilization, Tianjin University, Tianjin, 300350, China.

<sup>b</sup>School of Chemical Engineering, Tianjin University, Tianjin, 300350, China.

<sup>c</sup>Department of Chemistry & Environmental Science, School of Science, Tibet University, Lhasa, 850000, China.

\* Corresponding author E-mail: [jina@tju.edu.cn](mailto:jina@tju.edu.cn)

## Table of Contents

|                                       |     |
|---------------------------------------|-----|
| SECTION S1 SUPPLYMENTARY FIGURES      | S2  |
| SECTION S2 SUPPLYMENTARY TABLES       | S7  |
| SECTION S3 SYNTHESIS OF THE CATALYSTS | S11 |
| SECTION S4 REFERENCES                 | S12 |

## SECTION S1 SUPPLYMENTARY FIGURES

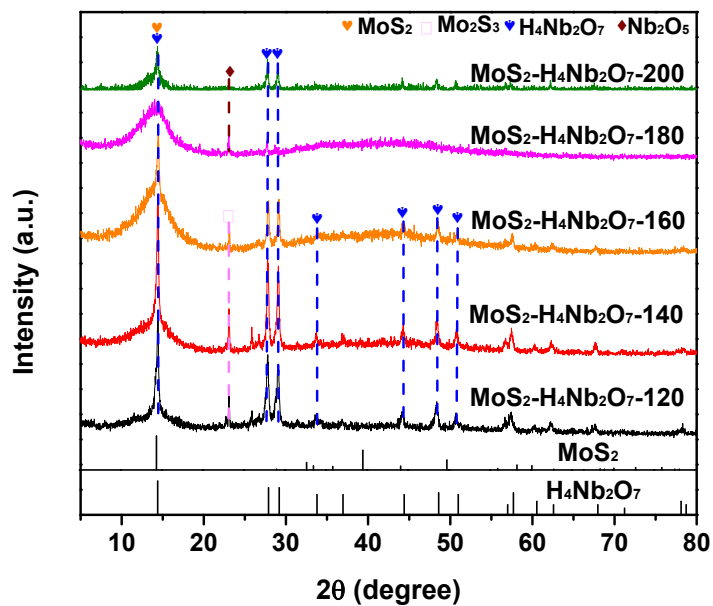

Figure S1. XRD spectra of the samples prepared under different temperatures.

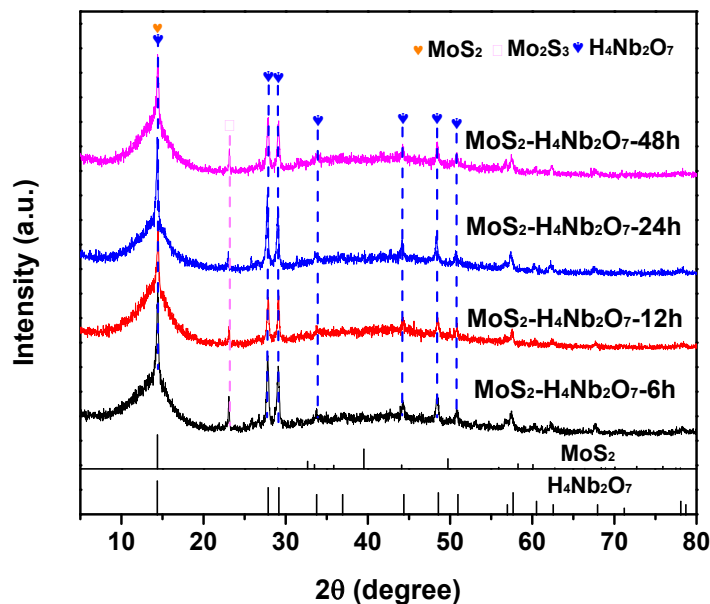

Figure S2. XRD spectra of the samples prepared under different hydrothermal time.

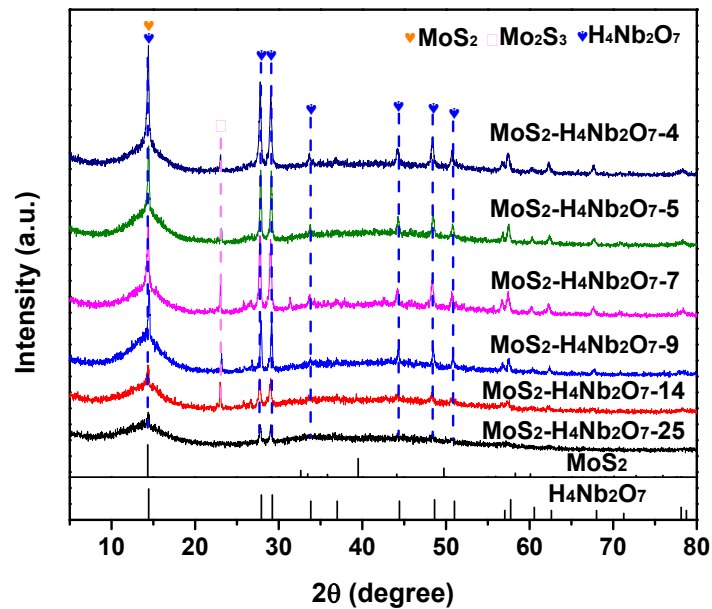

**Figure S3.** XRD spectra of the samples prepared under different Mo/Nb molar ratio.

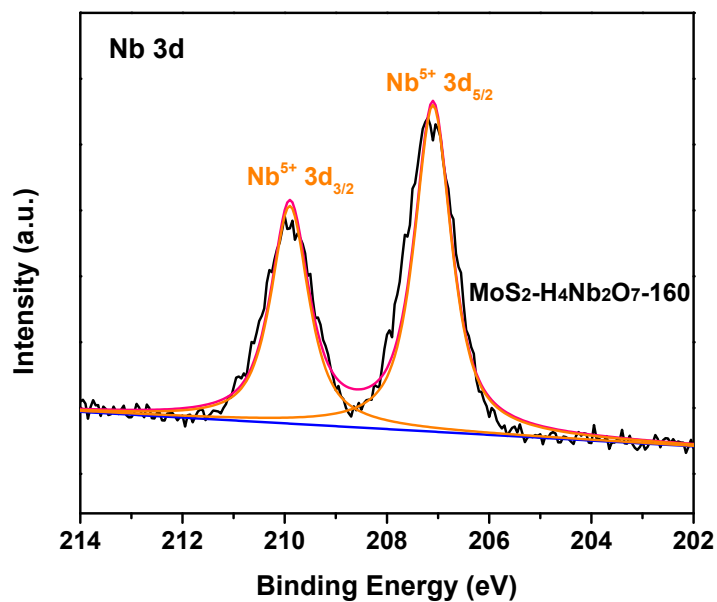

**Figure S4.** XPS spectrum of Nb 3d of the MoS<sub>2</sub>-H<sub>4</sub>Nb<sub>2</sub>O<sub>7</sub>-160 catalyst.

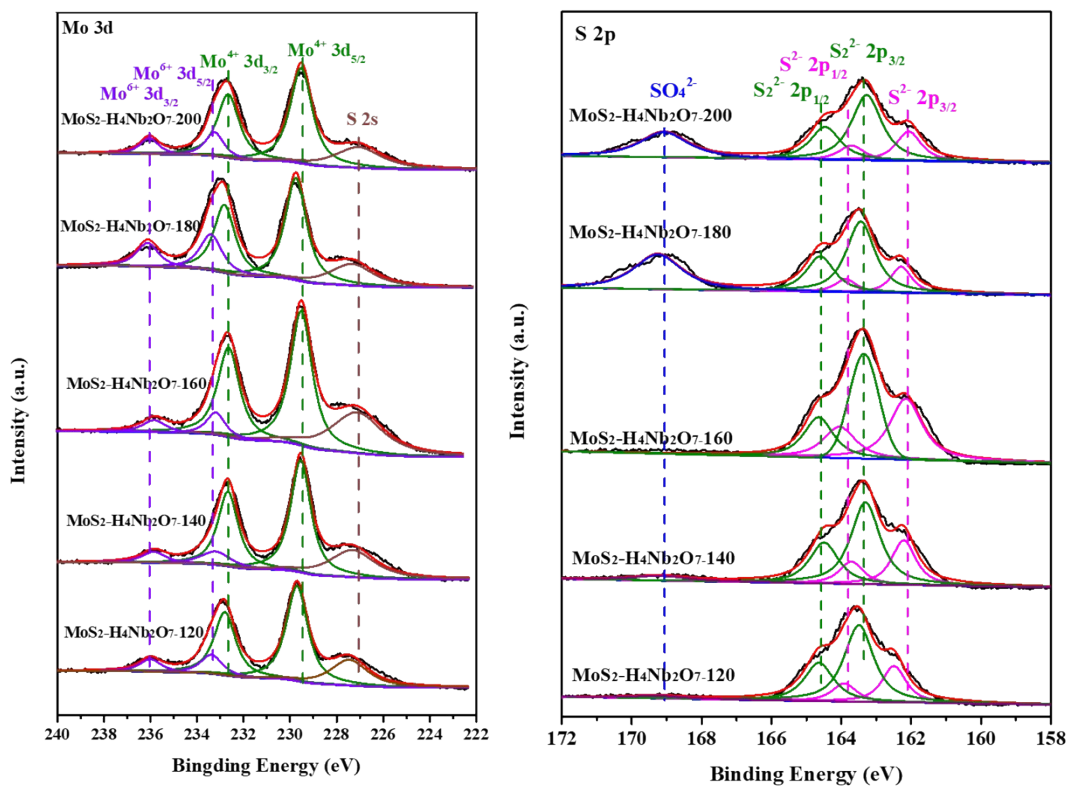

**Figure S5.** XPS spectra of (a) Mo 3d and (b) S 2p of MoS<sub>2</sub>-H<sub>4</sub>Nb<sub>2</sub>O<sub>7</sub> catalysts.

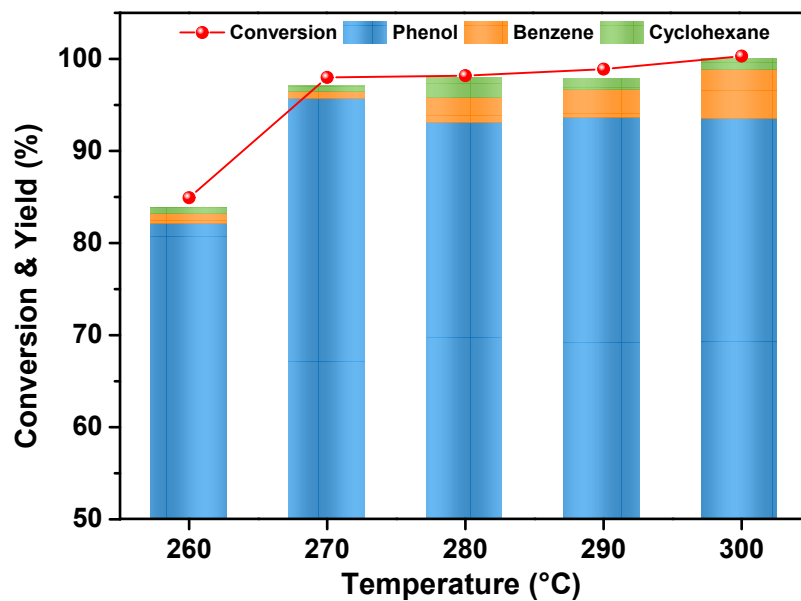

**Figure S6.** Effect of the reaction temperature in the conversion of anisole in the presence of MoS<sub>2</sub>-H<sub>4</sub>Nb<sub>2</sub>O<sub>7</sub>-160 catalyst (initial H<sub>2</sub> pressure was 3 MPa, reaction time was 4 h).

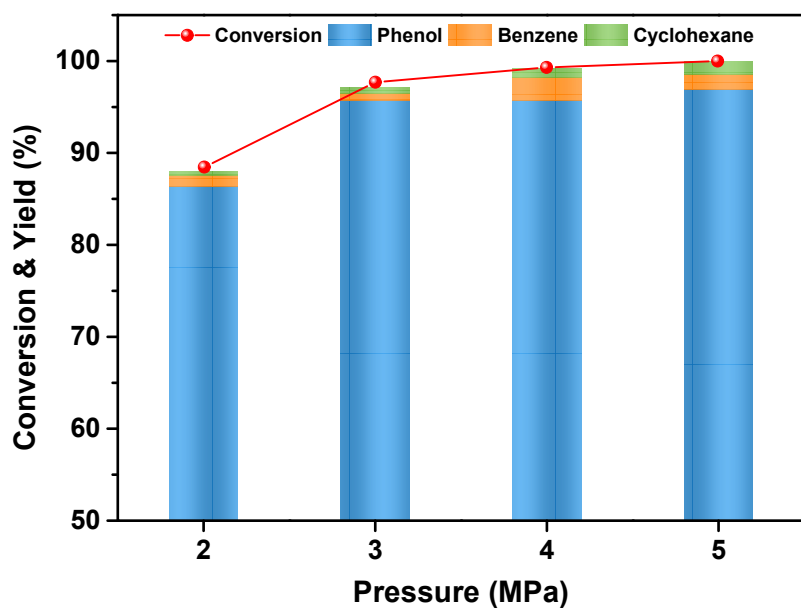

**Figure S7.** Effect of the initial H<sub>2</sub> pressure in the conversion of anisole in the presence of MoS<sub>2</sub>-H<sub>4</sub>Nb<sub>2</sub>O<sub>7</sub>-160 catalyst (reaction temperature was 270 °C, reaction time was 4h).

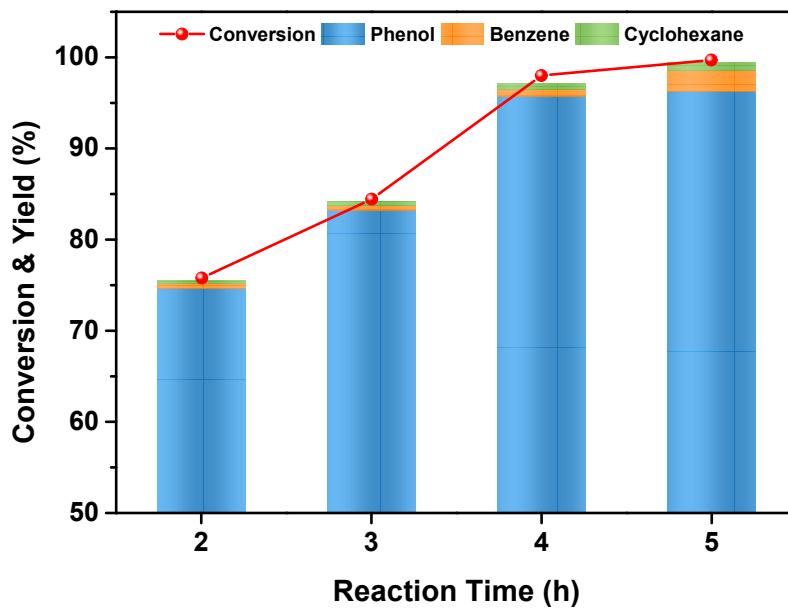

**Figure S8.** Effect of the reaction time in the conversion of anisole in the presence of  $\text{MoS}_2\text{-H}_4\text{Nb}_2\text{O}_7\text{-160}$  catalyst (reaction temperature was 270 °C, initial  $\text{H}_2$  pressure was 3 MPa).

## SECTION S2 SUPPLYMENTARY TABLES

**Table S1.** Demethylation of anisole to phenol results over different catalysts

| Catalyst                                                        | Reaction conditions |                  |                    | Results |       | Ref.      |
|-----------------------------------------------------------------|---------------------|------------------|--------------------|---------|-------|-----------|
|                                                                 | T                   | P                | t/TOS <sup>b</sup> | Conv.   | Sel.  |           |
|                                                                 | (°C)                | (MPa)            | (h)                | (%)     | (%)   |           |
| Fe/SiO <sub>2</sub>                                             | 400                 | 0.1              | 15 <sup>b</sup>    | 17.12   | 56    | 1         |
| Fe/Ni/HY                                                        | 350                 | 4                | 1                  | 94.02   | 37.56 | 2         |
| Pd/NbOPO <sub>4</sub>                                           | 300                 | 0.1              | 22 <sup>b</sup>    | 6.1     | 36.6  | 3         |
| Pt/HBeta                                                        | 400                 | 0.1              | 0.5 <sup>b</sup>   | 96      | 33    | 4         |
| Pd@MIL-101                                                      | 240                 | 1                | 8                  | 19      | 45.1  | 5         |
| PtZn/C                                                          | 325                 | 2.75             | 1 <sup>b</sup>     | 30      | 66    | 6         |
| Ni/SBA-15                                                       | 220                 | 5                | 2                  | 99.8    | 53.5  | 7         |
| RuNi/Al-SBA-15                                                  | 400                 | 0.1              | 24 <sup>b</sup>    | 10      | 99    | 8         |
| Ni/Al <sub>2</sub> O <sub>3</sub> -SiO <sub>2</sub>             | 400                 | 0.1              | 0.5 <sup>b</sup>   | 75.5    | 37.1  | 9         |
| Mo/CNTs                                                         | 450                 | 0.8              | 3 <sup>b</sup>     | 75      | 90    | 10        |
| CoMoS/Al <sub>2</sub> O <sub>3</sub>                            | 300                 | 0.8              | 6 <sup>b</sup>     | 40      | 70    | 11        |
| Pt/Ni/Al-SBA-15                                                 | 420                 | 0.1              | 6                  | 40      | 90    | 12        |
| Mo@Pt/SiO <sub>2</sub> -Al <sub>2</sub> O <sub>3</sub>          | 450                 | 0.1              | 1 <sup>b</sup>     | 87      | 65    | 13        |
| Re-MoO <sub>x</sub> /TiO <sub>2</sub>                           | 300                 | 5                | 4                  | 10      | 65    | 14        |
| HY                                                              | 240                 | 0.5 <sup>a</sup> | 3                  | 96.6    | 32.8  | 15        |
| MoS <sub>2</sub> -H <sub>4</sub> Nb <sub>2</sub> O <sub>7</sub> | 270                 | 3                | 4                  | 97.7    | 98.0  | this work |

<sup>a</sup> N<sub>2</sub> was pumped in to provide initial pressure

**Table S2.** The morphology parameters of MoS<sub>2</sub> in different catalyst

| Catalyst                                                             | Slab Length (nm) | Stacking Number | $f_e$ | $f_c$ | $f_c/f_e$ |
|----------------------------------------------------------------------|------------------|-----------------|-------|-------|-----------|
| MoS <sub>2</sub>                                                     | 3.1              | 5.6             | 0.28  | 0.085 | 0.30      |
| MoS <sub>2</sub> -H <sub>4</sub> Nb <sub>2</sub> O <sub>7</sub> -160 | 2.4              | 4.6             | 0.32  | 0.141 | 0.44      |

**Table S3.** Products distribution over MoS<sub>2</sub> and MoS<sub>2</sub>-H<sub>4</sub>Nb<sub>2</sub>O<sub>7</sub>-160 catalysts at 300 °C

| Catalyst                                                             | Conversion (%) | Yield (%) |         |             |
|----------------------------------------------------------------------|----------------|-----------|---------|-------------|
|                                                                      |                | Phenol    | Benzene | Cyclohexane |
| MoS <sub>2</sub>                                                     | 99.7           | 88.2      | 10.4    | 2.1         |
| MoS <sub>2</sub> -H <sub>4</sub> Nb <sub>2</sub> O <sub>7</sub> -160 | 98.8           | 95.6      | 2.6     | 0.6         |

<sup>a</sup> Reaction conditions: 300 °C, 3 MPa, 3 h.

**Table S4.** Catalytic activity of MoS<sub>2</sub>-H<sub>4</sub>Nb<sub>2</sub>O<sub>7</sub> prepared under different temperatures

| Catalyst                                                             | Conversion (%) | Yield (%) |         |             |
|----------------------------------------------------------------------|----------------|-----------|---------|-------------|
|                                                                      |                | Phenol    | Benzene | Cyclohexane |
| MoS <sub>2</sub> -H <sub>4</sub> Nb <sub>2</sub> O <sub>7</sub> -120 | 58.5           | 55.9      | 2.2     | 0.4         |
| MoS <sub>2</sub> -H <sub>4</sub> Nb <sub>2</sub> O <sub>7</sub> -140 | 84.4           | 74.5      | 3.9     | 1.1         |
| MoS <sub>2</sub> -H <sub>4</sub> Nb <sub>2</sub> O <sub>7</sub> -160 | 97.7           | 95.7      | 0.8     | 0.6         |
| MoS <sub>2</sub> -H <sub>4</sub> Nb <sub>2</sub> O <sub>7</sub> -180 | 94.9           | 88.9      | 5.4     | 0.6         |
| MoS <sub>2</sub> -H <sub>4</sub> Nb <sub>2</sub> O <sub>7</sub> -200 | 80.9           | 76.8      | 1.8     | 2.2         |

Reaction conditions: 270 °C, 3 MPa, 4 h.



**Table S5.** Catalytic activity of MoS<sub>2</sub> prepared under different temperatures

| Catalyst              | Conversion (%) | Yield (%) |         |             |
|-----------------------|----------------|-----------|---------|-------------|
|                       |                | Phenol    | Benzene | Cyclohexane |
| MoS <sub>2</sub> -120 | 56.5           | 52.5      | 2.3     | 0.3         |
| MoS <sub>2</sub> -140 | 65.2           | 61.4      | 2.2     | 0.8         |
| MoS <sub>2</sub> -160 | 68.9           | 67.8      | 0.7     | 0.4         |
| MoS <sub>2</sub> -180 | 95.5           | 82.7      | 2.3     | 1.3         |
| MoS <sub>2</sub> -200 | 95.7           | 83.3      | 6.7     | 1.4         |

Reaction conditions: 270 °C, 3 MPa, 4 h.

**Table S6.** Catalytic activity of MoS<sub>2</sub>-H<sub>4</sub>Nb<sub>2</sub>O<sub>7</sub> prepared under different time

| Catalyst                                                             | Conversion (%) | Yield (%) |         |             |
|----------------------------------------------------------------------|----------------|-----------|---------|-------------|
|                                                                      |                | Phenol    | Benzene | Cyclohexane |
| MoS <sub>2</sub> -H <sub>4</sub> Nb <sub>2</sub> O <sub>7</sub> -6h  | 87.0           | 67.3      | 3.2     | 1.3         |
| MoS <sub>2</sub> -H <sub>4</sub> Nb <sub>2</sub> O <sub>7</sub> -12h | 97.7           | 95.7      | 0.8     | 0.6         |
| MoS <sub>2</sub> -H <sub>4</sub> Nb <sub>2</sub> O <sub>7</sub> -24h | 97.3           | 90.8      | 3.8     | 1.1         |
| MoS <sub>2</sub> -H <sub>4</sub> Nb <sub>2</sub> O <sub>7</sub> -48h | 100.0          | 90.3      | 2.5     | 0.0         |

Reaction conditions: 270 °C, 3 MPa, 4 h.

**Table S7.** Catalytic activity of MoS<sub>2</sub>-H<sub>4</sub>Nb<sub>2</sub>O<sub>7</sub> prepared at different Mo/Nb molar ratio.

| Catalyst                                                            | Conversion (%) | Yield (%) |         |             |
|---------------------------------------------------------------------|----------------|-----------|---------|-------------|
|                                                                     |                | Phenol    | Benzene | Cyclohexane |
| MoS <sub>2</sub> -H <sub>4</sub> Nb <sub>2</sub> O <sub>7</sub> -25 | 76.9           | 72.3      | 3.0     | 1.7         |
| MoS <sub>2</sub> -H <sub>4</sub> Nb <sub>2</sub> O <sub>7</sub> -14 | 89.4           | 86.0      | 1.1     | 2.3         |
| MoS <sub>2</sub> -H <sub>4</sub> Nb <sub>2</sub> O <sub>7</sub> -9  | 96.5           | 93.6      | 1.9     | 1.1         |
| MoS <sub>2</sub> -H <sub>4</sub> Nb <sub>2</sub> O <sub>7</sub> -7  | 97.7           | 95.7      | 0.8     | 0.6         |
| MoS <sub>2</sub> -H <sub>4</sub> Nb <sub>2</sub> O <sub>7</sub> -5  | 75.9           | 72.5      | 1.1     | 2.2         |
| MoS <sub>2</sub> -H <sub>4</sub> Nb <sub>2</sub> O <sub>7</sub> -4  | 62.0           | 60.2      | 0.9     | 0.9         |

Reaction conditions: 270 °C, 3 MPa, 4 h.

**Table S8.** Recyclability test of MoS<sub>2</sub>-H<sub>4</sub>Nb<sub>2</sub>O<sub>7</sub>-160 with CS<sub>2</sub> added in the reaction.

| Entry | Run             | Conversion (%) | Yield (%) |         |             |
|-------|-----------------|----------------|-----------|---------|-------------|
|       |                 |                | Phenol    | Benzene | Cyclohexane |
| 1     | 1 <sup>st</sup> | 98.7           | 94.7      | 3.7     | 0.2         |
| 2     | 2 <sup>nd</sup> | 92.2           | 90.5      | 1.4     | 0.2         |
| 3     | 3 <sup>rd</sup> | 88.9           | 85.9      | 1.4     | 0.3         |
| 4     | 4 <sup>th</sup> | 88.4           | 83.9      | 0.8     | 0.2         |

Reaction conditions: 270 °C, 3 MPa, 4 h.

## SECTION S3 SYNTHESIS OF THE CATALYSTS

**Synthesis of  $\text{H}_4\text{Nb}_2\text{O}_7$ :** 0.2 g  $\text{Sn}_2\text{Nb}_2\text{O}_7$  was dispersed in 48 mL deionized water, and then the mixture was transferred into a 100 mL Teflon-lined stainless autoclave. The pH value was adjusted to 0.9 by adding 12 mL hydrochloric acid into the mixed solution under stirring. The autoclave was sealed and heated in an oven at 160 °C for 12 h. When the reaction finished,  $\text{H}_4\text{Nb}_2\text{O}_7$  was obtained by filtering, washing, and drying.

**Synthesis of  $\text{MoS}_2$ :** 0.92 g ammonium molybdate, and 1.2 g thiourea were dispersed into 48 mL deionized water, and then the mixture was transferred into a 100 mL Teflon-lined stainless autoclave. The pH value was adjusted to 0.9 by adding 12 mL hydrochloric acid into the mixed solution under stirring. The autoclave was sealed and heated in an oven at 160 °C for 12 h. After the hydrothermal reaction,  $\text{MoS}_2$  was received by separation.  $\text{MoS}_2\text{-X}$  represented that the synthesis temperature was changed to X °C, while  $\text{MoS}_2\text{-160}$  was written directly as  $\text{MoS}_2$ .

**Synthesis of  $\text{Sn}_2\text{Nb}_2\text{O}_7$ :** 0.8 g  $\text{Nb}_2\text{O}_5$  was dispersed in 72 mL KOH solution (3 mol/L) and transferred into a 100 mL Teflon-lined stainless autoclave. After a hydrothermal process at 200°C for 12 h, 0.72 g  $\text{SnCl}_2$  and 4.8 g urea were added into the solution obtained from the first step then nitrogen gas was entered to the bottom of the autoclave for 30 minutes to remove oxygen from the solution. Heated at 200 °C for 12 h, the products  $\text{Sn}_2\text{Nb}_2\text{O}_7$  were obtained after filtration and washed and dried.

## SECTION S4 REFERENCES

1. S. Wang, D. Xu, J. Zhao, W. Zheng, C. Hu, X. Wen, Y. Yang and Y. Li, *Catal. Sci. Technol.*, 2019, **9**, 5712-5724.
2. X. Xu, E. Jiang, Z. Li and Y. Sun, *Fuel*, 2018, **221**, 440-446.
3. C. A. Teles, P. M. de Souza, R. C. Rabelo-Neto, M. B. Griffin, C. Mukarakate, K. A. Orton, D. E. Resasco and F. B. Noronha, *Appl. Catal. B.*, 2018, **238**, 38-50.
4. X. Zhu, L. L. Lobban, R. G. Mallinson and D. E. Resasco, *J. Catal.*, 2011, **281**, 21-29.
5. H. Ren, C. Li, D. Yin, J. Liu and C. Liang, *RSC Adv.*, 2016, **6**, 85659-85665.
6. L. A.-R. a. J. M. V. Daming Shi, *J. Catal.*, 2016, **340**, 219-226.
7. T. M. Sankaranarayanan, A. Berenguer, C. Ochoa-Hernández, I. Moreno, P. Jana, J. M. Coronado, D. P. Serrano and P. Pizarro, *Catal. Today*, 2015, **243**, 163-172.
8. S. Pichaikaran and P. Arumugam, *Green Chem.*, 2016, **18**, 2888-2899.
9. H. Taghvaei, M. R. Rahimpour and P. Bruggeman, *RSC Adv.*, 2017, **7**, 30990-30998.
10. B. Rahzani, M. Saidi, H. R. Rahimpour, B. C. Gates and M. R. Rahimpour, *RSC Adv.*, 2017, **7**, 10545-10556.
11. H. R. Rahimpour, M. Saidi, P. Rostami, B. C. Gates and M. R. Rahimpour, *Int. J. Chem. Kinet.*, 2016, **48**, 702-713.
12. P. Sudhakar and A. Pandurangan, *J. Porous Mater.*, 2017, **25**, 747-759.
13. Q. Lai, C. Zhang and J. H. Holles, *Catal. Sci. Technol.*, 2017, **7**, 3220-3233.
14. I. T. Ghampson, R. Canales and N. Escalona, *Appl. Catal. A.*, 2018, **549**, 225-236.
15. Q. Meng, H. Fan, H. Liu, H. Zhou, Z. He, Z. Jiang, T. Wu and B. Han, *ChemCatChem*, 2015, **7**, 2831-2835.
